# Supplementary material for: The importance of pollen chemistry in evolutionary host shifts of bees
Source: PubMed Central journal article supplement (PMC5316986; doi:10.1038/srep43058), 2017-02-20
Supplement: srep43058-s1.pdf [file srep43058-s1.pdf]

**– Supplementary Information –**

**The importance of pollen chemistry in evolutionary host shifts of bees**

Maryse Vanderplanck<sup>1,\*</sup>, Nicolas J. Vereecken<sup>2</sup>, Laurent Grumiau<sup>3</sup>, Fabiana Esposito<sup>4</sup>, Georges Lognay<sup>5</sup>, Ruddy Wattiez<sup>6</sup> and Denis Michez<sup>1</sup>

<sup>1</sup>Laboratory of Zoology, Research Institute for Biosciences, University of Mons - UMONS, Place du Parc 20, B-7000 Mons, Belgium.

<sup>2</sup>Landscape Ecology & Plant Production Systems Unit, Interfaculty School of Bioengineering (EIB), Université Libre de Bruxelles, Boulevard du Triomphe CP 160/12, B-1050 Brussels, Belgium.

<sup>3</sup>Département de Biologie des Organismes, Université Libre de Bruxelles, av. Paul Héger, CP 160/12, B-1050 Brussels, Belgium.

<sup>4</sup>Earth and Life Institute, Biodiversity Research Centre, Université Catholique de Louvain, Croix du Sud 4 L7.07.04, B-1348 Louvain-la-Neuve, Belgium.

<sup>5</sup>Unit of Analytical Chemistry, University of Liège (Gembloux Agro-Bio Tech), Passage des Déportés 2, B-5030 Gembloux, Belgium.

<sup>6</sup>Department of Proteomic and Microbiology, Research Institute for Biosciences, University of Mons - UMONS, Place du Parc 20, B-7000 Mons, Belgium.

\* Corresponding author; +32 67 35 38 03; [maryse.vanderplanck@umons.ac.be](mailto:maryse.vanderplanck@umons.ac.be)

**Supplementary Appendix S1.** Details on the Gas Chromatography/Mass Spectrometry (GC-MS) procedure used to determine floral scents

The extracts were analysed by Gas Chromatography/Mass Spectrometry (GC-MS) on a Thermo Trace GC Ultra coupled to a Thermo Polaris-Q ion trap mass and equipped with a Restek RXI-5 MS column (30 m length x 0,25 mm diameter x 0,25  $\mu$ m film thickness). Aliquots (1  $\mu$ l) of the extracts were injected in splitless mode with an initial temperature of the column maintained 4 min at 35 °C and then programmed to 200 °C at 5 °C min<sup>-1</sup> and maintained for 1 min. After this isotherm at 200 °C, the temperature was increased to 270 °C (10 °C min<sup>-1</sup>) then isothermal at 270 °C for 10 min. Helium was used as carrier gas. We used the Xcalibur™ Software to calculate the relative amounts of odor compounds in the floral scent extracts.

**Supplementary Table S1.** Floral scent compositions from the host-plants of the *Colletes succinctus* group, the *Melitta leporina* group and the plant species of the outgroup. Mean  $\pm$  SE, relative amounts (in %).

| Compounds                                   | <i>Colletes succinctus</i> group  |                                    |                                | <i>Melitta leporina</i> group       |                                   |                                    | Outgroup                         |                                |
|---------------------------------------------|-----------------------------------|------------------------------------|--------------------------------|-------------------------------------|-----------------------------------|------------------------------------|----------------------------------|--------------------------------|
|                                             | <i>Aster tripolium</i><br>(n = 5) | <i>Calluna vulgaris</i><br>(n = 5) | <i>Hedera helix</i><br>(n = 4) | <i>Lythrum salicaria</i><br>(n = 5) | <i>Medicago sativa</i><br>(n = 5) | <i>Odontites luteus</i><br>(n = 5) | <i>Echium vulgare</i><br>(n = 5) | <i>Reseda lutea</i><br>(n = 5) |
| Fatty acid derivatives (%)                  | 39.91 $\pm$ 19.38                 | 81.40 $\pm$ 7.57                   | 0                              | 11.87 $\pm$ 6.68                    | 49.08 $\pm$ 20.41                 | 52.73 $\pm$ 17.56                  | 0                                | 0.57 $\pm$ 0.14                |
| Benzenoids (%)                              | 1.93 $\pm$ 0.90                   | 1.57 $\pm$ 0.86                    | 16.58 $\pm$ 16.58              | 3.50 $\pm$ 3.40                     | 0                                 | 8.23 $\pm$ 5.01                    | 9.95 $\pm$ 9.95                  | 2.76 $\pm$ 0.73                |
| Terpenoids (%)                              | 58.15 $\pm$ 18.84                 | 17.03 $\pm$ 7.36                   | 83.42 $\pm$ 16.58              | 84.63 $\pm$ 6.44                    | 50.92 $\pm$ 20.41                 | 39.02 $\pm$ 13.70                  | 90.05 $\pm$ 9.95                 | 96.67 $\pm$ 0.71               |
| Monoterpenoids (%)                          | 44.80 $\pm$ 17.03                 | 9.38 $\pm$ 4.94                    | 65.96 $\pm$ 20.01              | 52.03 $\pm$ 15.43                   | 47.68 $\pm$ 19.73                 | 35.94 $\pm$ 12.93                  | 90.05 $\pm$ 9.95                 | 5.64 $\pm$ 0.79                |
| Sesquiterpenoids (%)                        | 13.36 $\pm$ 4.52                  | 7.64 $\pm$ 2.74                    | 17.46 $\pm$ 14.04              | 32.60 $\pm$ 16.44                   | 3.24 $\pm$ 2.07                   | 3.08 $\pm$ 1.29                    | 0                                | 91.03 $\pm$ 1.34               |
| Total N odour compounds detected            | 38                                | 25                                 | 10                             | 22                                  | 13                                | 25                                 | 8                                | 30                             |
| <b>Fatty acid derivatives</b>               |                                   |                                    |                                |                                     |                                   |                                    |                                  |                                |
| <i>trans</i> -4,8-dimethyl-1,3,7-nonatriene | 4.64 $\pm$ 1.73                   | 2.09 $\pm$ 0.72                    | 0                              | 7.53 $\pm$ 3.67                     | 0                                 | 0                                  | 0                                | 0.38 $\pm$ 0.17                |
| <i>cis</i> -4,8-dimethyl-1,3,7-nonatriene   | 0.70 $\pm$ 0.36                   | 0.12 $\pm$ 0.04                    | 0                              | 0.74 $\pm$ 0.74                     | 0                                 | 0                                  | 0                                | 0                              |
| 2,4-dimethyl-1-heptanol                     | 0                                 | 0                                  | 0                              | 0                                   | 0.33 $\pm$ 0.24                   | 0                                  | 0                                | 0                              |
| Acetate (hexyl or heptyl)                   | 0                                 | 0                                  | 0                              | 0                                   | 0.67 $\pm$ 0.67                   | 0                                  | 0                                | 0                              |
| <i>cis</i> -3-hexenyl acetate               | 0.30 $\pm$ 0.30                   | 53.67 $\pm$ 10.47                  | 0                              | 0                                   | 35.06 $\pm$ 21.48                 | 8.59 $\pm$ 8.59                    | 0                                | 0                              |
| <i>cis</i> -3-hexenyl iso-butyrate          | 0                                 | 17.80 $\pm$ 2.67                   | 0                              | 1.78 $\pm$ 1.78                     | 0                                 | 0                                  | 0                                | 0                              |
| <i>cis</i> -3-hexenyl-2-methylbutanoate     | 0                                 | 5.04 $\pm$ 1.02                    | 0                              | 0                                   | 0                                 | 0                                  | 0                                | 0                              |

## Supplementary Information

|                                              |                   |                 |                   |                 |                 |                   |                 |                 |
|----------------------------------------------|-------------------|-----------------|-------------------|-----------------|-----------------|-------------------|-----------------|-----------------|
| Unidentified unsaturated alcohols or alkenes | 0                 | 0               | 0                 | 0               | $1.83 \pm 1.47$ | 0                 | 0               | 0               |
| Unidentified alcohol (C8)                    | 0                 | $2.26 \pm 1.89$ | 0                 | $0.44 \pm 0.44$ | $0.04 \pm 0.03$ | 0                 | 0               | 0               |
| Unidentified aliphatic hydrocarbon           | 0                 | 0               | 0                 | $1.38 \pm 0.88$ | $1.64 \pm 1.64$ | 0                 | 0               | $0.19 \pm 0.07$ |
| Unidentified alkanes                         | $34.26 \pm 21.43$ | 0               | 0                 | 0               | $9.28 \pm 6.47$ | $44.16 \pm 20.35$ | 0               | 0               |
| Unidentified ketone (C8)                     | 0                 | $0.41 \pm 0.34$ | 0                 | 0               | $0.23 \pm 0.23$ | 0                 | 0               | 0               |
| <b>Benzenoids</b>                            |                   |                 |                   |                 |                 |                   |                 |                 |
| 2,6-Diisopropylnaphthalene                   | 0                 | 0               | 0                 | 0               | 0               | 0                 | 0               | $1.17 \pm 0.48$ |
| Benzoic acid, methyl ester                   | 0                 | 0               | 0                 | $3.38 \pm 3.38$ | 0               | 0                 | $9.95 \pm 9.95$ | 0               |
| Benzaldehyde                                 | $0.21 \pm 0.09$   | $0.03 \pm 0.03$ | 0                 | $0.12 \pm 0.08$ | 0               | 0                 | 0               | $0.09 \pm 0.05$ |
| Benzene derivative (anisole?)                | $0.24 \pm 0.14$   | $1.54 \pm 0.85$ | 0                 | 0               | 0               | 0                 | 0               | 0               |
| Benzenecetaldehyde                           | $1.32 \pm 0.84$   | 0               | 0                 | 0               | 0               | 0                 | 0               | 0               |
| Cyclopentane (?)                             | 0                 | 0               | $16.58 \pm 16.58$ | 0               | 0               | 0                 | 0               | 0               |
| Pityol                                       | $0.17 \pm 0.08$   | 0               | 0                 | 0               | 0               | $8.23 \pm 5.01$   | 0               | $1.50 \pm 0.37$ |
| <b>Terpenoids</b>                            |                   |                 |                   |                 |                 |                   |                 |                 |
| Cadinene(?)                                  | 0                 | $0.39 \pm 0.35$ | 0                 | 0               | 0               | 0                 | 0               | 0               |
| Cubebol (?)                                  | 0                 | 0               | 0                 | $1.63 \pm 0.61$ | 0               | 0                 | 0               | 0               |
| <i>trans</i> - $\beta$ -farnesene            | 0                 | 0               | 0                 | 0               | 0               | 0                 | 0               | $8.75 \pm 1.48$ |
| 1-(3-Ethylphenyl)ethan-1-one                 | 0                 | 0               | 0                 | 0               | 0               | 0                 | 0               | $0.96 \pm 0.15$ |

## Supplementary Information

|                                 |              |             |               |               |               |               |               |              |
|---------------------------------|--------------|-------------|---------------|---------------|---------------|---------------|---------------|--------------|
| 1-Phellandrene                  | 0.45 ± 0.20  | 0.16 ± 0.11 | 0             | 0             | 0             | 1.89 ± 0.82   | 0             | 0            |
| 1,7-diepi-β-cedrene             | 0            | 0           | 0             | 0             | 0             | 1.05 ± 0.55   | 0             | 0            |
| 10s,11s-Himachala-3(12),4-diene | 0            | 0           | 0             | 0             | 0             | 0             | 0             | 66.84 ± 1.66 |
| 1H-cyclopropa[a]naphthalene     | 0.27 ± 0.10  | 0           | 2.74 ± 2.74   | 0             | 0             | 0             | 0             | 0            |
| 2,2-dimethyl-5-methoxyindan     | 0.28 ± 0.12  | 0           | 0             | 0             | 0             | 0.89 ± 0.83   | 0             | 0            |
| 3-Carene                        | 6.72 ± 2.89  | 5.63 ± 3.35 | 0             | 31.28 ± 12.84 | 46.99 ± 19.38 | 25.31 ± 10.07 | 35.45 ± 14.43 | 0.61 0.24    |
| 4-terpineol                     | 0            | 0.45 ± 0.33 | 0             | 0.45 ± 0.37   | 0             | 0             | 15.06 ± 4.88  | 0.45 ± 0.20  |
| α-selinene                      | 0.47 ± 0.17  | 0           | 0             | 0             | 0             | 0.15 ± 0.13   | 0             | 0.63 ± 0.32  |
| α-bergamotene                   | 1.10 ± 0.47  | 0           | 7.01 ± 7.01   | 0             | 0             | 0.34 ± 0.25   | 0             | 0.31 ± 0.05  |
| α-cubebene ( ?)                 | 5.24 ± 3.60  | 0.40 ± 0.38 | 0             | 0             | 0             | 0             | 0             | 0            |
| α-himachalene ( ?)              | 3.73 ± 3.56  | 0           | 0             | 0             | 0             | 0             | 0             | 0            |
| α-longipinene                   | 0            | 0           | 0             | 0             | 0             | 0             | 0             | 1.94 ± 0.13  |
| α-terpinolene                   | 1.08 ± 0.31  | 0           | 26.30 ± 24.60 | 0.22 ± 0.22   | 0             | 0             | 2.48 ± 0.72   | 0.22 ± 0.06  |
| Aristolene                      | 1.03 ± 0.52  | 6.11 ± 1.79 | 2.72 ± 2.72   | 28.86 ± 15.07 | 3.24 ± 2.07   | 0.63 ± 0.57   | 0             | 5.44 ± 0.60  |
| β-myrcene                       | 10.44 ± 5.37 | 0.15 ± 0.11 | 0             | 0             | 0             | 1.68 ± 0.68   | 0             | 2.71 ± 0.37  |
| β-ocimene                       | 5.20 ± 2.27  | 0.43 ± 0.27 | 0             | 12.06 ± 3.83  | 0.62 ± 0.62   | 1.53 ± 0.72   | 0             | 0            |
| β-pinene                        | 12.90 ± 4.91 | 1.71 ± 0.92 | 17.76 ± 10.37 | 1.51 ± 1.12   | 0             | 1.19 ± 0.52   | 0             | 0.14 ± 0.08  |
| Camphene                        | 0.28 ± 0.11  | 0           | 0             | 0             | 0             | 0             | 0             | 0.03 ± 0.02  |
| Eucalyptol (?)                  | 0            | 0           | 17.60 ± 15.25 | 3.40 ± 2.68   | 0.07 ± 0.07   | 1.02 ± 1.02   | 0             | 0.04 ± 0.03  |

## Supplementary Information

|                               |                 |                 |                 |                 |   |                 |                  |                 |
|-------------------------------|-----------------|-----------------|-----------------|-----------------|---|-----------------|------------------|-----------------|
| Germacrene B                  | 0               | 0               | $3.86 \pm 3.86$ | 0               | 0 | 0               | 0                | 0               |
| Lilac aldehyde C              | 0               | 0               | 0               | $1.82 \pm 1.82$ | 0 | 0               | $29.05 \pm 9.87$ | $1.09 \pm 0.60$ |
| Lilac aldehyde D              | 0               | $0.16 \pm 0.14$ | 0               | $0.32 \pm 0.32$ | 0 | 0               | $5.44 \pm 2.20$  | $0.03 \pm 0.03$ |
| Linalool oxide                | 0               | 0               | 0               | $0.17 \pm 0.17$ | 0 | $0.53 \pm 0.26$ | $2.01 \pm 0.67$  | 0               |
| Longifolene                   | 0               | $0.15 \pm 0.05$ | $1.13 \pm 1.13$ | $0.94 \pm 0.69$ | 0 | 0               | 0                | $3.96 \pm 1.19$ |
| Myrtanol (?)                  | 0               | $0.67 \pm 0.18$ | $4.31 \pm 3.71$ | 0               | 0 | 0               | $0.55 \pm 0.55$  | $0.20 \pm 0.11$ |
| Sabinene                      | $7.08 \pm 3.03$ | $0.02 \pm 0.02$ | 0               | $0.22 \pm 0.22$ | 0 | $2.79 \pm 1.19$ | 0                | $0.05 \pm 0.02$ |
| Unidentified monoterpenoids   | $0.65 \pm 0.33$ | 0               | 0               | $0.59 \pm 0.28$ | 0 | 0               | 0                | $0.08 \pm 0.05$ |
| Unidentified sesquiterpenoids | $0.53 \pm 0.42$ | $0.25 \pm 0.25$ | 0               | $1.17 \pm 0.61$ | 0 | $0.03 \pm 0.03$ | 0                | $2.19 \pm 0.35$ |
| Zingiberene                   | $0.70 \pm 0.28$ | $0.35 \pm 0.32$ | 0               | 0               | 0 | 0               | 0                | 0               |

---

---

**Supplementary Table S2.** Sterolic compositions from the pollen of the *Colletes succinctus* hosts, the *Melitta leporina* hosts and the non-host plants. The concentrations are expressed as percentage of total sterolic compounds. The three major sterols for each plant species are in bold.

| Sterols                                 | <i>Colletes succinctus</i> group  |                                    |                                | <i>Melitta leporina</i> group       |                                   |                                    | Outgroup                         |                                |
|-----------------------------------------|-----------------------------------|------------------------------------|--------------------------------|-------------------------------------|-----------------------------------|------------------------------------|----------------------------------|--------------------------------|
|                                         | <i>Aster tripolium</i><br>(n = 3) | <i>Calluna vulgaris</i><br>(n = 3) | <i>Hedera helix</i><br>(n = 3) | <i>Lythrum salicaria</i><br>(n = 3) | <i>Medicago sativa</i><br>(n = 3) | <i>Odontites luteus</i><br>(n = 3) | <i>Echium vulgare</i><br>(n = 3) | <i>Reseda lutea</i><br>(n = 3) |
| Cholesterol                             | 2.10 ± 0.61                       | 2.28 ± 0.52                        | 4.40 ± 0.63                    | 0.57 ± 0.11                         | 1.73 ± 1.36                       | 1.32 ± 0.23                        | 1.50 ± 1.18                      | 1.21 ± 0.02                    |
| Desmosterol                             | 0.72 ± 0.57                       | 0.05 ± 0.01                        | 0.21 ± 0.07                    | 0.06 ± 0.03                         | 0.10 ± 0.06                       | N.D.                               | 0.15 ± 0.24                      | 0.12 ± 0.02                    |
| 24-Methylenecholesterol/<br>campesterol | <b>19.80 ± 0.77</b>               | 2.16 ± 0.09                        | 4.82 ± 0.12                    | <b>27.94 ± 0.44</b>                 | 4.94 ± 4.94                       | <b>8.55 ± 5.09</b>                 | <b>65.62 ± 10.38</b>             | 7.31 ± 0.45                    |
| Stigmasterol                            | 3.94 ± 2.53                       | <b>12.12 ± 0.96</b>                | 4.48 ± 0.01                    | 0.86 ± 0.14                         | 1.41 ± 1.64                       | 4.62 ± 1.13                        | 1.86 ± 0.52                      | 4.66 ± 0.20                    |
| Unk.484                                 | 2.15 ± 0.26                       | 1.47 ± 0.08                        | 2.86 ± 0.38                    | 1.91 ± 0.14                         | 8.31 ± 0.62                       | 5.55 ± 1.08                        | 1.40 ± 0.31                      | 3.34 ± 0.28                    |
| β-sitosterol                            | 2.12 ± 0.37                       | <b>41.66 ± 1.42</b>                | <b>24.70 ± 0.78</b>            | <b>25.78 ± 0.38</b>                 | <b>10.22 ± 5.01</b>               | <b>41.05 ± 2.07</b>                | <b>12.95 ± 4.43</b>              | <b>30.36 ± 1.19</b>            |
| δ5-avenasterol                          | 0.45 ± 0.21                       | <b>27.02 ± 0.58</b>                | <b>12.68 ± 0.08</b>            | <b>24.23 ± 2.51</b>                 | 7.47 ± 4.60                       | <b>30.21 ± 1.75</b>                | 7.07 ± 3.17                      | <b>33.44 ± 2.36</b>            |
| Cholestenone                            | 1.67 ± 0.94                       | 1.87 ± 0.33                        | 1.90 ± 1.11                    | 13.05 ± 1.72                        | 2.23 ± 1.18                       | 2 ± 0.45                           | 5.80 ± 0.40                      | 6.6 ± 1.53                     |
| δ7-stigmasterol                         | <b>40.34 ± 2.06</b>               | 2.44 ± 0.29                        | <b>32.12 ± 0.66</b>            | 4.77 ± 0.89                         | <b>53.81 ± 7.87</b>               | 4.93 ± 1.57                        | N.D.                             | <b>9.67 ± 0.15</b>             |
| δ7-avenasterol                          | <b>26.70 ± 0.59</b>               | 8.94 ± 0.44                        | 11.84 ± 0.41                   | 0.83 ± 0.32                         | 9.78 ± 5.31                       | 1.76 ± 0.37                        | 3.64 ± 2.70                      | 3.29 ± 0.37                    |

**Supplementary Table S3.** Amino acids from the host-pollen of the *Colletes succinctus* group, the *Melitta leporina* group and the outgroup. The concentrations are expressed as percentage of total amino acids.

| Amino acids   | <i>Colletes succinctus</i> group  |                                    |                                | <i>Melitta leporina</i> group       |                                   |                                    | Outgroup                         |                                |
|---------------|-----------------------------------|------------------------------------|--------------------------------|-------------------------------------|-----------------------------------|------------------------------------|----------------------------------|--------------------------------|
|               | <i>Aster tripolium</i><br>(n = 3) | <i>Calluna vulgaris</i><br>(n = 3) | <i>Hedera helix</i><br>(n = 3) | <i>Lythrum salicaria</i><br>(n = 3) | <i>Medicago sativa</i><br>(n = 3) | <i>Odontites luteus</i><br>(n = 3) | <i>Echium vulgare</i><br>(n = 3) | <i>Reseda lutea</i><br>(n = 3) |
| Alanine       | 5.43 ± 0.04                       | 5.07 ± 0.02                        | 4.47 ± 0.03                    | 5.33 ± 0.07                         | 5.20 ± 0.05                       | 4.65 ± 0.04                        | 5.48 ± 0.04                      | 4.90 ± 0.01                    |
| Arginine      | 5.17 ± 0.03                       | 7.20 ± 0.04                        | 6.00 ± 0.09                    | 6.58 ± 0.10                         | 5.96 ± 0.04                       | 5.62 ± 0.10                        | 6.39 ± 0.16                      | 5.82 ± 0.11                    |
| Asparagine    | 9.77 ± 0.04                       | 9.80 ± 0.04                        | 9.77 ± 0.31                    | 10.56 ± 0.07                        | 9.85 ± 0.08                       | 8.88 ± 0.34                        | 10.44 ± 0.03                     | 11.79 ± 0.11                   |
| Cysteine      | 1.32 ± 0.12                       | 1.15 ± 0.05                        | 0.99 ± 0.12                    | 0.12 ± 0.08                         | 0.95 ± 0.12                       | 0.81 ± 0.12                        | 0.27 ± 0.01                      | 0.19 ± 0.02                    |
| Glutamate     | 11.06 ± 0.06                      | 11.60 ± 0.13                       | 9.86 ± 0.16                    | 13.64 ± 0.12                        | 11.82 ± 0.07                      | 10.37 ± 10.18                      | 11.52 ± 0.19                     | 15.59 ± 0.17                   |
| Glycine       | 5.23 ± 0.04                       | 4.36 ± 0.02                        | 3.67 ± 0.03                    | 4.28 ± 0.05                         | 4.07 ± 0.01                       | 3.82 ± 0.04                        | 4.40 ± 0.05                      | 4.13 ± 0.03                    |
| Histidine     | 5.38 ± 0.00                       | 3.66 ± 0.01                        | 2.91 ± 0.05                    | 3.71 ± 0.05                         | 3.41 ± 0.03                       | 3.70 ± 0.02                        | 3.63 ± 0.04                      | 3.71 ± 0.05                    |
| Isoleucine    | 4.43 ± 0.01                       | 4.78 ± 0.03                        | 4.59 ± 0.05                    | 4.82 ± 0.05                         | 5.14 ± 0.04                       | 4.87 ± 0.06                        | 5.60 ± 0.05                      | 4.71 ± 0.09                    |
| Leucine       | 7.09 ± 0.05                       | 7.73 ± 0.02                        | 6.72 ± 0.05                    | 7.90 ± 0.08                         | 7.81 ± 0.01                       | 7.30 ± 0.10                        | 7.75 ± 0.05                      | 7.48 ± 0.10                    |
| Lysine        | 10.16 ± 0.05                      | 7.92 ± 0.15                        | 7.59 ± 0.09                    | 8.03 ± 0.12                         | 8.13 ± 0.10                       | 7.35 ± 0.29                        | 7.58 ± 0.10                      | 7.50 ± 0.21                    |
| Méthionine    | 2.63 ± 0.14                       | 2.95 ± 0.05                        | 1.88 ± 0.71                    | 0.50 ± 0.10                         | 2.69 ± 0.15                       | 2.46 ± 0.15                        | 0.79 ± 0.02                      | 0.37 ± 0.04                    |
| Phenylalanine | 4.41 ± 0.02                       | 5.07 ± 0.06                        | 4.66 ± 0.08                    | 5.18 ± 0.03                         | 5.34 ± 0.08                       | 4.81 ± 0.14                        | 5.67 ± 0.02                      | 5.01 ± 0.07                    |
| Proline       | 7.34 ± 0.08                       | 7.98 ± 0.08                        | 18.45 ± 0.16                   | 8.77 ± 0.65                         | 8.87 ± 0.03                       | 16.38 ± 0.54                       | 9.14 ± 0.65                      | 8.41 ± 0.56                    |
| Serine        | 5.35 ± 0.02                       | 5.59 ± 0.03                        | 4.85 ± 0.06                    | 5.40 ± 0.06                         | 5.37 ± 0.03                       | 4.87 ± 0.02                        | 5.30 ± 0.04                      | 5.36 ± 0.01                    |
| Threonine     | 5.46 ± 0.00                       | 4.89 ± 0.03                        | 4.58 ± 0.02                    | 5.23 ± 0.07                         | 5.04 ± 0.00                       | 4.61 ± 0.02                        | 5.83 ± 0.11                      | 5.23 ± 0.07                    |
| Tyrosine      | 4.12 ± 0.05                       | 4.29 ± 0.02                        | 3.62 ± 0.06                    | 4.07 ± 0.06                         | 4.34 ± 0.08                       | 4.07 ± 0.12                        | 4.77 ± 0.02                      | 4.01 ± 0.05                    |
| Valine        | 5.65 ± 0.09                       | 6.07 ± 0.04                        | 5.40 ± 0.11                    | 5.89 ± 0.10                         | 6.00 ± 0.06                       | 5.44 ± 0.14                        | 5.45 ± 0.07                      | 5.81 ± 0.01                    |



**Supplementary Table S4.** Location and coordinates of sampled host and non-host pollens

| Bee group                           | Host-plant               | Location                                    | Coordinates            |
|-------------------------------------|--------------------------|---------------------------------------------|------------------------|
| <i>Colletes succinctus</i><br>group | <i>Aster tripolium</i>   | Netherlands, New-Namen,<br>Saefthinge       | 51°21'32"N 04°13'06"E  |
|                                     | <i>Calluna vulgaris</i>  | United Kingdom, Surrey,<br>Milford          | 51°10'14"N 0°44'25"E   |
|                                     | <i>Hedera helix</i>      | Belgium, Brussels,<br>Koekelberg            | 50°51'36"N 04°19'58"E  |
| <i>Melitta leporina</i><br>group    | <i>Lythrum salicaria</i> | Belgium, Mons, University<br>garden         | 50°27'55"N 03°57' 26"E |
|                                     | <i>Medicago sativa</i>   | Belgium, Mons, University<br>garden         | 50°27'55"N 03°57' 26"E |
|                                     | <i>Odontites luteus</i>  | French, Gonfaron, Les<br>Houerts des Maures | 43°18'36"N 6°17' 46"E  |
| Outgroup                            | <i>Echium vulgare</i>    | Belgium, Mons, University<br>garden         | 50°27'55"N 03°57' 26"E |
|                                     | <i>Reseda lutea</i>      | Belgium, Mons, University<br>garden         | 50°27'55"N 03°57' 26"E |
